# Supplementary material for: Research Trend of Organ-Preserving Pancreatic Resection from 2000 to 2022: A Bibliometric and Visualized Analysis
Source: Research Square preprint supplement (doi:10.21203/rs.3.rs-2179955/v1), 2022-10-18
Supplement: Supplementary file 1 [file 853a9b01b7144f20214fc539.docx]

Table S1 Details of the T200 articles.

| **Rank** | **Article** | **Authors** | **Journal** | **Types of documents** | **Publication Year** | **No. of Citations** | **Citation density** | **IDEAL stage** |
| --- | --- | --- | --- | --- | --- | --- | --- | --- |
|  | Laparoscopic pancreatic resection: Results of a multicenter European study of 127 patients | Mabrut, JY; Fernandez-Cruz, L; Azagra, JS; Bassi, C; Delvaux, G; Weerts, J; Fabre, JM; Boulez, P; Baulieux, J; Peix, JL; Gigot, JF | SURGERY | retrospective study | 2005 | 337 | 18.72 | 3 |
|  | Pancreatic fistula after pancreatic head resection | Buchler, MW; Friess, H; Wagner, M; Kulli, C; Wagener, V; Z'graggen, K | BRITISH JOURNAL OF SURGERY | prospective study | 2000 | 336 | 14.61 | 1 |
|  | Pylorus preserving pancreaticoduodenectomy versus standard Whipple procedure - A prospective, randomized, multicenter analysis of 170 patients with pancreatic and periampullary tumors | Tran, KTC; Smeenk, HG; van Eijck, CHJ; Kazemier, G; Hop, WC; Greve, JWG; Terpstra, OT; Zijlstra, JA; Klinkert, P; Jeekel, H | ANNALS OF SURGERY | RCT | 2004 | 296 | 15.58 | 4 |
|  | The value of splenic preservation with distal pancreatectomy | Shoup, M; Brennan, MF; McWhite, K; Leung, DHY; Klimstra, D; Conlon, KC | ARCHIVES OF SURGERY | prospective study | 2002 | 260 | 12.38 | 3 |
|  | Critical Appraisal of 232 Consecutive Distal Pancreatectomies With Emphasis on Risk Factors, Outcome, and Management of the Postoperative Pancreatic Fistula A 21-Year Experience at a Single Institution | Goh, Brian K. P.; Tan, Yu-Meng; Chung, Yaw-Fui Alexander; Cheow, Peng-Chung; Ong, Hock-Soo; Chan, Weng-Hoong; Chow, Pierce K. H.; Soo, Khee-Chee; Wong, Wai-Keong; Ooi, L. P. J. | ARCHIVES OF SURGERY | retrospective study | 2008 | 211 | 14.07 | 3 |
|  | Laparoscopic distal pancreatectomy - Results on a consecutive series of 58 patients | Melotti, Gianluigi; Butturini, Giovanni; Piccoli, Micaela; Casetti, Luca; Bassi, Claudio; Mullineris, Barbara; Lazzaretti, Maria Grazia; Pederzoli, Paolo | ANNALS OF SURGERY | prospective study | 2007 | 191 | 11.94 | 1 |
|  | Outcome of pancreaticoduodenectomy with pylorus preservation or with antrectomy in the treatment of chronic pancreatitis | Jimenez, RE; Castillo, CF; Rattner, DW; Chang, YC; Warshaw, AL | ANNALS OF SURGERY | retrospective study | 2000 | 185 | 8.04 | 4 |
|  | Middle pancreatectomy - Indications, short- and long-term operative outcomes | Crippa, Stefano; Bassi, Claudio; Warshaw, Andrew L.; Falconi, Massimo; Partelli, Stefano; Thayer, Sarah P.; Pederzoli, Paolo; Fernandez-del Castillo, Carlos | ANNALS OF SURGERY | retrospective study | 2007 | 180 | 11.25 | 4 |
|  | Curative laparoscopic resection for pancreatic neoplasms: A critical analysis from a single institution | Fernandez-Cruz, Laureano; Cosa, Rebeca; Blanco, Laia; Levi, Sammy; Lopez-Boado, Miguel-Angel; Navarro, Salvador | JOURNAL OF GASTROINTESTINAL SURGERY | prospective study | 2007 | 169 | 10.56 | 1 |
|  | Pancreaticoduodenectomy with or without distal gastrectomy and extended retroperitoneal lymphadenectomy for periampullary adenocarcinoma - Part 3: Update on 5-year survival | Riall, TS; Cameron, JL; Lillemoe, KD; Campbell, KA; Sauter, PK; Coleman, J; Abrams, RA; Laheru, D; Hruban, RH; Yeo, CJ | JOURNAL OF GASTROINTESTINAL SURGERY | RCT | 2005 | 163 | 9.06 | 4 |
|  | Short-term clinical outcomes for 100 consecutive cases of laparoscopic pylorus-preserving pancreatoduodenectomy: improvement with surgical experience | Kim, Song C.; Song, Ki B.; Jung, Yong S.; Kim, Young H.; Park, Do H.; Lee, Sang S.; Seo, Dong W.; Lee, Sung K.; Kim, Myung H.; Park, Kwang M.; Lee, Young J. | SURGICAL ENDOSCOPY AND OTHER INTERVENTIONAL TECHNIQUES | prospective study | 2013 | 148 | 14.8 | 1 |
|  | Effect of enteral nutrition and synbiotics on bacterial infection rates after pylorus-preserving pancreatoduodenectomy - A randomized, double-blind trial | Rayes, Nada; Seehofer, Daniel; Theruvath, Tom; Mogl, Martina; Langrehr, Jan M.; Nuessler, Natascha C.; Bengmark, Stig; Neuhaus, Peter | ANNALS OF SURGERY | RCT | 2007 | 146 | 9.13 | 2a |
|  | Pancreatogastrostomy With Gastric Partition After Pylorus-Preserving Pancreatoduodenectomy Versus Conventional Pancreatojejunostomy A Prospective Randomized Study | Fernandez-Cruz, Laureano; Cosa, Rebeca; Blanco, Laia; Lopez-Boado, Miguel Angel; Astudillo, Emiliano | ANNALS OF SURGERY | RCT | 2008 | 141 | 9.4 | 3 |
|  | Is laparoscopic resection adequate in patients with neuroendocrine pancreatic tumors? | Fernandez-Cruz, Laureano; Blanco, Laia; Cosa, Rebeca; Rendon, Hector | WORLD JOURNAL OF SURGERY | prospective study | 2008 | 141 | 9.4 | 1 |
|  | The potent somatostatin analogue vapreotide does not decrease pancreas-specific complications after elective pancreatectomy: A prospective, multicenter, double-blinded, randomized, placebo-controlled trial | Sarr, MG | JOURNAL OF THE AMERICAN COLLEGE OF SURGEONS | RCT | 2003 | 140 | 7 | 2a |
|  | Long-term follow-up of a randomized trial comparing the Beger and Frey procedures for patients suffering from chronic pancreatitis | Strate, T; Taherpour, Z; Bloechle, C; Mann, O; Bruhn, JP; Schneider, C; Kuechler, T; Yekebas, E; Izbicki, JR | ANNALS OF SURGERY | RCT | 2005 | 137 | 7.61 | 3 |
|  | Laparoscopic distal pancreatectomy combined with preservation of the spleen for cystic neoplasms of the pancreas | Fernandez-Cruz, L; Martinez, I; Gilabert, R; Cesar-Borges, G; Astudillo, E; Navarro, S | JOURNAL OF GASTROINTESTINAL SURGERY | prospective study | 2004 | 136 | 7.16 | 1 |
|  | Single-center experience of laparoscopic left pancreatic resection in 359 consecutive patients: changing the surgical paradigm of left pancreatic resection | Song, Ki Byung; Kim, Song Cheol; Park, Jae Berm; Kim, Young Hoon; Jung, Young Soo; Kim, Myung-Hwan; Lee, Sung-Koo; Seo, Dong-Wan; Lee, Sang Soo; Park, Do Hyun; Han, Duck Jong | SURGICAL ENDOSCOPY AND OTHER INTERVENTIONAL TECHNIQUES | retrospective study | 2011 | 133 | 11.08 | 1 |
|  | Long-term results of distal pancreatectomy for chronic pancreatitis in 90 patients | Hutchins, RR; Hart, RS; Pacifico, M; Bradley, NJ; Williamson, RCN | ANNALS OF SURGERY | retrospective study | 2002 | 129 | 6.14 | 4 |
|  | Randomized prospective trial of pylorus-preserving vs. classic duodenopancreatectomy (Whipple procedure): Initial clinical results | Seiler, CA; Wagner, M; Sadowski, C; Kulli, C; Buchler, MW | JOURNAL OF GASTROINTESTINAL SURGERY | prospective study | 2000 | 129 | 5.61 | 3 |
|  | Pylorus Ring Resection Reduces Delayed Gastric Emptying in Patients Undergoing Pancreatoduodenectomy A Prospective, Randomized, Controlled Trial of Pylorus-Resecting Versus Pylorus-Preserving Pancreatoduodenectomy | Kawai, Manabu; Tani, Masaji; Hirono, Seiko; Miyazawa, Motoki; Shimizu, Atsushi; Uchiyama, Kazuhisa; Yamaue, Hiroki | ANNALS OF SURGERY | RCT | 2011 | 128 | 10.67 | 3 |
|  | Resection of pancreatic neuroendocrine tumors - Results of 70 cases | Kazanjian, Kevork K.; Reber, Howard A.; Hines, Oscar J. | ARCHIVES OF SURGERY | retrospective study | 2006 | 125 | 7.35 | 1 |
|  | Laparoscopic approach for solitary insulinoma: a multicentre study | Ayav, A; Bresler, L; Brunaud, L; Boissel, P | LANGENBECKS ARCHIVES OF SURGERY | retrospective study | 2005 | 125 | 6.94 | 2b |
|  | Factors influencing delayed gastric emptying after pylorus-preserving pancreatoduodenectomy | Park, YC; Kim, SW; Jang, JY; Ahn, YJ; Park, YH | JOURNAL OF THE AMERICAN COLLEGE OF SURGEONS | retrospective study | 2003 | 120 | 6 | 1 |
|  | Enucleation in pancreatic surgery: indications, technique, and outcome compared to standard pancreatic resections | Hackert, Thilo; Hinz, Ulf; Fritz, Stefan; Strobel, Oliver; Schneider, Lutz; Hartwig, Werner; Buechler, Markus W.; Werner, Jens | LANGENBECKS ARCHIVES OF SURGERY | prospective study | 2011 | 119 | 9.92 | 3 |
|  | A modified technique of the Beger and Frey procedure in patients with chronic pancreatitis | Gloor, B; Friess, H; Uhl, W; Buchler, MW | DIGESTIVE SURGERY | others | 2001 | 118 | 5.36 | 2a |
|  | Enucleation of pancreatic neoplasms | Crippa, S.; Bassi, C.; Salvia, R.; Falconi, M.; Butturini, G.; Pederzoli, P. | BRITISH JOURNAL OF SURGERY | prospective study | 2007 | 117 | 7.31 | 1 |
|  | Parenchyma-Preserving Resections for Small Nonfunctioning Pancreatic Endocrine Tumors | Falconi, Massimo; Zerbi, Alessandro; Crippa, Stefano; Balzano, Gianpaolo; Boninsegna, Letizia; Capitanio, Vanessa; Bassi, Claudio; Di Carlo, Valerio; Pederzoli, Paolo | ANNALS OF SURGICAL ONCOLOGY | retrospective study | 2010 | 115 | 8.85 | 4 |
|  | Effect of antecolic reconstruction on delayed gastric emptying after the pylorus-preserving Whipple procedure | Hartel, M; Wente, MN; Hinz, U; Kleeff, J; Wagner, M; Muller, MW; Friess, H; Buchler, MW | ARCHIVES OF SURGERY | prospective study | 2005 | 111 | 6.17 | 2a |
|  | Resection vs drainage in treatment of chronic pancreatitis: Long-term results of a randomized trial | Strate, Tim; Bachmann, Kai; Busch, Philipp; Mann, Oliver; Schneider, Claus; Bruhn, Jens P.; Yekebas, Emre; Kuechler, Thomas; Bloechle, Christian; Izbicki, Jakob R. | GASTROENTEROLOGY | RCT | 2008 | 109 | 7.27 | 4 |
|  | Cystic pancreatic neoplasms: Enucleate or resect? | Kiely, JM; Nakeeb, A; Komorowski, RA; Wilson, SD; Pitt, HA | JOURNAL OF GASTROINTESTINAL SURGERY | retrospective study | 2003 | 109 | 5.45 | 3 |
|  | Duodenum-preserving pancreatic head resection versus pancreatoduodenectomy for surgical treatment of chronic pancreatitis - A systematic review and meta-analysis | Diener, Markus K.; Rahbari, Nuh N.; Fischer, Lars; Antes, Gerd; Buechler, Markus W.; Seiler, Christoph M. | ANNALS OF SURGERY | review | 2008 | 108 | 7.2 | review |
|  | Systematic review of central pancreatectomy and meta-analysis of central versus distal pancreatectomy | Iacono, C.; Verlato, G.; Ruzzenente, A.; Campagnaro, T.; Bacchelli, C.; Valdegamberi, A.; Bortolasi, L.; Guglielmi, A. | BRITISH JOURNAL OF SURGERY | review | 2013 | 103 | 10.3 | review |
|  | Long-term outcome after resection for chronic pancreatitis in 224 patients | Riediger, Hartwig; Adam, Ulrich; Fischer, Eva; Keck, Tobias; Pfeffer, Frank; Hopt, Ulrich T.; Makowiec, Frank | JOURNAL OF GASTROINTESTINAL SURGERY | prospective study | 2007 | 100 | 6.25 | 4 |
|  | Delayed gastric emptying after pylorus-preserving pancreatoduodenectomy is strongly related to other postoperative complications | Riediger, H; Makowiec, F; Schareck, WD; Hopt, UT; Adam, U | JOURNAL OF GASTROINTESTINAL SURGERY | retrospective study | 2003 | 98 | 4.9 | 1 |
|  | Pylorus preservation has no impact on delayed gastric emptying after pancreatic head resection | Horstmann, O; Markus, PM; Ghadimi, MB; Becker, H | PANCREAS | prospective study | 2004 | 97 | 5.11 | 1 |
|  | Twenty-Three Years of the Warshaw Operation for Distal Pancreatectomy With Preservation of the Spleen | Ferrone, Cristina R.; Konstantinidis, Ioannis T.; Sahani, Dushyant V.; Wargo, Jennifer A.; Castillo, Carlos Fernandez-del; Warshaw, Andrew L. | ANNALS OF SURGERY | retrospective study | 2011 | 92 | 7.67 | 1 |
|  | Surgery of resectable nonfunctioning neuroendocrine pancreatic tumors | Dralle, H; Krohn, SL; Karges, W; Boehm, BO; Brauckhoff, M; Gimm, O | WORLD JOURNAL OF SURGERY | review | 2004 | 92 | 4.84 | review |
|  | Surgical Management of Insulinomas Short- and Long-term Outcomes After Enucleations and Pancreatic Resections | Crippa, Stefano; Zerbi, Alessandro; Boninsegna, Letizia; Capitanio, Vanessa; Partelli, Stefano; Balzano, Gianpaolo; Pederzoli, Paolo; Di Carlo, Valerio; Falconi, Massimo | ARCHIVES OF SURGERY | Retrospective study | 2012 | 91 | 8.27 | 3 |
|  | Median pancreatectomy for tumors of the neck and body of the pancreas | Sperti, C; Pasquali, C; Ferronato, A; Pedrazzoli, S | JOURNAL OF THE AMERICAN COLLEGE OF SURGEONS | retrospective study | 2000 | 91 | 3.96 | 1 |
|  | Small Pancreatic and Periampullary Neuroendocrine Tumors: Resect or Enucleate? | Pitt, Susan C.; Pitt, Henry A.; Baker, Marshall S.; Christians, Kathleen; Touzios, John G.; Kiely, James M.; Weber, Sharon M.; Wilson, Stuart D.; Howard, Thomas J.; Talamonti, Mark S.; Rikkers, Layton F. | JOURNAL OF GASTROINTESTINAL SURGERY | retrospective study | 2009 | 88 | 6.29 | 3 |
|  | Spleen-preserving distal pancreatectomy with excision of splenic artery and vein: A case-matched comparison with conventional distal pancreatectomy with splenectomy | Carrere, Nicolas; Abid, Skander; Julio, Charles Henri; Bloom, Eric; Pradere, Bernard | WORLD JOURNAL OF SURGERY | retrospective study | 2007 | 87 | 5.44 | 3 |
|  | Central pancreatectomy revisited | Roggin, Kevin K.; Rudloff, Udo; Blumgart, Leslie H.; Brennan, Murray F. | JOURNAL OF GASTROINTESTINAL SURGERY | retrospective study | 2006 | 83 | 4.88 | 1 |
|  | Central pancreatectomy with pancreaticogastrostomy for benign pancreatic pathology | Efron, DT; Lillemoe, KD; Cameron, JL; Yeo, CJ | JOURNAL OF GASTROINTESTINAL SURGERY | retrospective study | 2004 | 81 | 4.26 | 2a |
|  | Comparison of the functional outcome after pylorus-preserving pancreatoduodenectomy: Pancreatogastrostomy and pancreatojejunostomy | Jang, JY; Kim, SW; Park, SJ; Park, YH | WORLD JOURNAL OF SURGERY | retrospective study | 2002 | 81 | 3.86 | 4 |
|  | Better preservation of endocrine function after central versus distal pancreatectomy for mid-gland lesions | DiNorcia, Joseph; Ahmed, League; Lee, Minna K.; Reavey, Patrick L.; Yakaitis, Elizabeth A.; Lee, James A.; Schrope, Beth A.; Chabot, John A.; Allendorf, John D. | SURGERY | retrospective study | 2010 | 80 | 6.15 | 4 |
|  | Outcome after duodenum-preserving pancreatic head resection is improved compared with classic Whipple procedure in the treatment of chronic pancreatitis | Witzigmann, H; Max, D; Uhlmann, D; Geissler, F; Schwarz, R; Ludwig, S; Lohmann, T; Caca, K; Keim, V; Tannapfel, A; Hauss, J | SURGERY | prospective study | 2003 | 79 | 3.95 | 3 |
|  | Pancreatic Enucleation: Improved Outcomes Compared to Resection | Cauley, C. E.; Pitt, H. A.; Ziegler, K. M.; Nakeeb, A.; Schmidt, C. M.; Zyromski, N. J.; House, M. G.; Lillemoe, K. D. | JOURNAL OF GASTROINTESTINAL SURGERY | retrospective study | 2012 | 78 | 7.09 | 4 |
|  | Long-term follow-up of a randomized clinical trial comparing Beger with pylorus-preserving Whipple procedure for chronic pancreatitis | Mueller, M. W.; Friess, H.; Martin, D. J.; Hinz, U.; Dahmen, R.; Buechler, M. W. | BRITISH JOURNAL OF SURGERY | RCT | 2008 | 77 | 5.13 | 4 |
|  | Laparoscopic Spleen-Preserving Distal Pancreatectomy Splenic Vessel Preservation Compared With the Warshaw Technique | Adam, Jean-Philippe; Jacquin, Alexandre; Laurent, Christophe; Collet, Denis; Masson, Bernard; Fernandez-Cruz, Laureano; Sa-Cunha, Antonio | JAMA SURGERY | retrospective study | 2013 | 75 | 7.5 | 3 |
|  | Central pancreatectomy - Single-center experience of 50 cases | Adham, Mustapha; Giunippero, Alejandro; Hervieu, Valerie; Courbiere, Marion; Partensky, Christian | ARCHIVES OF SURGERY | retrospective study | 2008 | 73 | 4.87 | 4 |
|  | Hemodynamic changes of splenogastric circulation after spleen-preserving pancreatectomy with excision of splenic artery and vein | Miura, F; Takada, T; Asano, T; Kenmochi, T; Ochiai, T; Amano, H; Yoshida, M | SURGERY | retrospective study | 2005 | 72 | 4 | 4 |
|  | Distal pancreatectomy with preservation of the spleen | Warshaw, Andrew L. | JOURNAL OF HEPATO-BILIARY-PANCREATIC SCIENCES | review | 2010 | 71 | 5.46 | review |
|  | Laparoscopic distal pancreatectomy - Results of a prospective non-randomized study from a tertiary center | Palanivelu, C.; Shetty, R.; Jani, K.; Sendhilkumar, K.; Rajan, P. S.; Maheshkumar, G. S. | SURGICAL ENDOSCOPY AND OTHER INTERVENTIONAL TECHNIQUES | prospective study | 2007 | 70 | 4.38 | 1 |
|  | Meta-analysis of surgical outcome after enucleation versus standard resection for pancreatic neoplasms | Huettner, F. J.; Koessler-Ebs, J.; Hackert, T.; Ulrich, A.; Buechler, M. W.; Diener, M. K. | BRITISH JOURNAL OF SURGERY | others | 2015 | 69 | 8.63 | Meta-analysis |
|  | Parenchyma-Sparing Resections for Pancreatic Neuroendocrine Tumors | Cherif, Rim; Gaujoux, Sebastien; Couvelard, Anne; Dokmak, Safi; Vuillerme, Marie-Pierre; Ruszniewski, Philippe; Belghiti, Jacques; Sauvanet, Alain | JOURNAL OF GASTROINTESTINAL SURGERY | retrospective study | 2012 | 69 | 6.27 | 4 |
|  | Robotic approach improves spleen-preserving rate and shortens postoperative hospital stay of laparoscopic distal pancreatectomy: a matched cohort study | Chen, Shi; Zhan, Qian; Chen, Jiang-zhi; Jin, Jia-bin; Deng, Xia-xing; Chen, Hao; Shen, Bai-yong; Peng, Cheng-hong; Li, Hong-wei | SURGICAL ENDOSCOPY AND OTHER INTERVENTIONAL TECHNIQUES | prospective study | 2015 | 68 | 8.5 | 2a |
|  | Partial pancreatoduodenectomy versus duodenum-preserving pancreatic head resection in chronic pancreatitis: the multicentre, randomised, controlled, double-blind ChroPac trial | Diener, Markus K.; Huettner, Felix J.; Kieser, Meinhard; Knebel, Phillip; Doerr-Harim, Colette; Distler, Marius; Gruetzmann, Robert; Wittel, Uwe A.; Schirren, Rebekka; Hau, Hans-Michael; Kleespies, Axel; Heidecke, Claus-Dieter; Tomazic, Ales; Halloran, Christopher M.; Wilhelm, Torsten J.; Bahra, Marcus; Beckurts, Tobias; Boerner, Thomas; Glanemann, Matthias; Steger, Ulrich; Treitschke, Frank; Staib, Ludger; Thelen, Karsten; Brueckner, Thomas; Mihaljevic, Andre L.; Werner, Jens; Ulrich, Alexis; Hackert, Thilo; Buechler, Markus W. | AMERICAN JOURNAL OF SURGERY | RCT | 2004 | 67 | 11.17 | 4 |
|  | A new reconstruction method for preventing delayed gastric emptying after pylorus-preserving pancreatoduodenectomy | Sugiyama, M; Abe, N; Ueki, H; Masaki, T; Mori, T; Atomi, Y | LANCET | retrospective study | 2017 | 67 | 3.53 | 2a |
|  | Spleen-preserving distal pancreatectomy with conservation of the splenic artery and vein: techniques and its significance | Kimura, Wataru; Yano, Mitsuhiro; Sugawara, Shuichiro; Okazaki, Shinji; Sato, Tamie; Moriya, Toshiyuki; Watanabe, Toshihiro; Fujimoto, Hiroto; Tezuka, Koji; Takeshita, Akiko; Hirai, Ichiro | JOURNAL OF HEPATO-BILIARY-PANCREATIC SCIENCES | retrospective study | 2010 | 66 | 5.08 | 1 |
|  | Patency of splenic vessels after laparoscopic spleen and splenic vessel-preserving distal pancreatectomy | Yoon, Y. -S.; Lee, K. H.; Han, H. -S.; Cho, J. Y.; Ahn, K. S. | BRITISH JOURNAL OF SURGERY | retrospective study | 2009 | 66 | 4.71 | 4 |
|  | Is laparoscopic left pancreatic resection justified? | Fabre, JM; Dulucq, JL; Vacher, C; Lemoine, MC; Wintringer, P; Nocca, D; Burgel, JS; Domergue, J | SURGICAL ENDOSCOPY AND OTHER INTERVENTIONAL TECHNIQUES | retrospective study | 2002 | 66 | 3.14 | 1 |
|  | Endosonography-guided, fine-needle aspiration cytology extending the indication for organ-preserving pancreatic surgery | Fritscher-Ravens, A; Izbicki, JR; Sriram, PVJ; Krause, C; Knoefel, WT; Topalidis, T; Jaeckle, S; Thonke, F; Soehendra, N | AMERICAN JOURNAL OF GASTROENTEROLOGY | prospective study | 2000 | 66 | 2.87 | 2a |
|  | Middle pancreatectomy: Safety and long-term results | Shikano, Toshio; Nakao, Akimasa; Kodera, Yasuhiro; Yamada, Suguru; Fujii, Tsutomu; Sugimoto, Hiroyuki; Kanazumi, Naohito; Nomoto, Shuji; Takeda, Shin | SURGERY | retrospective study | 2010 | 65 | 5 | 4 |
|  | Duodenum-preserving pancreatic head resection - A randomized controlled trial comparing the original Beger procedure with the Berne modification (ISRCTN No. 50638764) | Koeninger, Joerg; Seiler, Christoph M.; Sauerland, Stefan; Wente, Moritz N.; Reidel, Margot A.; Mueller, Michael W.; Friess, Helmut; Buechler, Markus W. | SURGERY | RCT | 2008 | 65 | 4.33 | 4 |
|  | Central pancreatectomy - A technique for the resection of pancreatic neck lesions | Christein, JD; Smoot, RL; Farnell, MB | ARCHIVES OF SURGERY | retrospective study | 2006 | 65 | 3.82 | 4 |
|  | Laparoscopic enucleation of pancreatic neoplasm | Dedieu, A.; Rault, A.; Collet, D.; Masson, B.; Cunha, A. Sa | SURGICAL ENDOSCOPY AND OTHER INTERVENTIONAL TECHNIQUES | retrospective study | 2011 | 64 | 5.33 | 2a |
|  | Postoperative Outcomes of Enucleation and Standard Resections in Patients with a Pancreatic Neuroendocrine Tumor | Jilesen, Anneke P. J.; van Eijck, Casper H. J.; Busch, Olivier R. C.; van Gulik, Thomas M.; Gouma, Dirk J.; van Dijkum, Els J. M. Nieveen | WORLD JOURNAL OF SURGERY | retrospective study | 2016 | 62 | 8.86 | 4 |
|  | Reappraisal of Central Pancreatectomy A 12-Year Single-Center Experience | Goudard, Yvain; Gaujoux, Sebastien; Dockmak, Safi; Cros, Jerome; Couvelard, Anne; Palazzo, Maxime; Ronot, Maxime; Vullierme, Marie-Pierre; Ruszniewski, Philippe; Belghiti, Jacques; Sauvanet, Alain | JAMA SURGERY | retrospective study | 2014 | 61 | 6.78 | 4 |
|  | A Central Pancreatectomy for Benign or Low-Grade Malignant Neoplasms | Hirono, Seiko; Tani, Masaji; Kawai, Manabu; Ina, Shinomi; Nishioka, Ryohei; Miyazawa, Motoki; Shimizu, Atsushi; Uchiyama, Kazuhisa; Yamaue, Hiroki | JOURNAL OF GASTROINTESTINAL SURGERY | prospective study | 2009 | 61 | 4.36 | 3 |
|  | Prognosis of sporadic resected small (<= 2 cm) nonfunctional pancreatic neuroendocrine tumors - a multi-institutional study | Sallinen, Ville J.; Le Large, Tessa T. Y.; Tieftrunk, Elke; Galeev, Shamil; Kovalenko, Zahar; Haugvik, Sven-Petter; Antila, Anne; Franklin, Oskar; Martinez-Moneo, Emma; Robinson, Stuart M.; Panzuto, Francesco; Regenet, Nicolas; Muffatti, Francesca; Partelli, Stefano; Wiese, Dominik; Ruszniewski, Philippe; Dousset, Bertrand; Edwin, Bjorn; Bartsch, Detlef K.; Sauvanet, Alain; Massimo, Falconi; Ceyhan, Gueralp O.; Gaujoux, Sebastien | HPB (Oxford) | retrospective study | 2012 | 59 | 11.8 | 4 |
|  | Perioperative and long-term results of laparoscopic spleen-preserving distal pancreatectomy with or without splenic vessels conservation: A retrospective analysis | Butturini, Giovanni; Inama, Marco; Malleo, Giuseppe; Manfredi, Riccardo; Melotti, Gian Luigi; Piccoli, Micaela; Perandini, Simone; Pederzoli, Paolo; Bassi, Claudio | JOURNAL OF SURGICAL ONCOLOGY | retrospective study | 2013 | 59 | 5.36 | 4 |
|  | Is the Whipple Procedure Harmful for Long-term Outcome in Treatment of Chronic Pancreatitis? 15-Years Follow-up Comparing the Outcome after Pylorus-Preserving Pancreatoduodenectomy and Frey Procedure in Chronic Pancreatitis | Bachmann, Kai; Tomkoetter, Lena; Kutup, Asad; Erbes, Johannes; Vashist, Yogesh; Mann, Oliver; Bockhorn, Maximilian; Izbicki, Jakob R. | ANNALS OF SURGERY | RCT | 2011 | 58 | 5.8 | 4 |
|  | Critical appraisal of the International Study Group of Pancreatic Surgery (ISGPS) consensus definition of postoperative hemorrhage after pancreatoduodenectomy | Welsch, Thilo; Eisele, Hanna; Zschaebitz, Stefanie; Hinz, Ulf; Buechler, Markus W.; Wente, Moritz N. | LANGENBECKS ARCHIVES OF SURGERY | prospective study | 2011 | 58 | 4.83 |  |
|  | Initial experiences using robot-assisted central pancreatectomy with pancreaticogastrostomy: a potential way to advanced laparoscopic pancreatectomy | Kang, Chang Moo; Kim, Dong Hyun; Lee, Woo Jung; Chi, Hoon Sang | SURGICAL ENDOSCOPY AND OTHER INTERVENTIONAL TECHNIQUES | retrospective study | 2003 | 58 | 4.83 | 2a |
|  | Surgical treatment of benign and borderline neoplasms of the pancreatic body | Balzano, G; Zerbi, A; Veronesi, P; Cristallo, M; Di Carlo, V | DIGESTIVE SURGERY | retrospective study | 2018 | 58 | 2.9 | 4 |
|  | Risk Factors for Postoperative Pancreatic Fistulization Subsequent to Enucleation | Brient, Celine; Regenet, Nicolas; Sulpice, Laurent; Brunaud, Laurent; Mucci-Hennekine, Stephanie; Carrere, Nicolas; Milin, Jenifer; Ayav, Ahmet; Pradere, Bernard; Hamy, Antoine; Bresler, Laurent; Meunier, Bernard; Mirallie, Eric | HPB | retrospective study | 2012 | 57 | 5.18 | 4 |
|  | Long-Term Outcome after 92 Duodenum-Preserving Pancreatic Head Resections for Chronic Pancreatitis: Comparison of Beger and Frey Procedures | Keck, Tobias; Wellner, Ulrich Friedrich; Riediger, Hartwig; Adam, Ulrich; Sick, Olivia; Hopt, Ulrich Theodor; Makowiec, Frank | JOURNAL OF GASTROINTESTINAL SURGERY | prospective study | 2010 | 57 | 4.38 | 4 |
|  | No mortality after 150 consecutive pancreatoduodenctomies with duct-to-mucosa pancreaticogastrostomy | Murakami, Yoshiaki; Uemura, Kenichiro; Hayashidani, Yasuo; Sudo, Takeshi; Hashimoto, Yasushi; Nakagawa, Naoya; Ohge, Hiroki; Sueda, Taijiro | JOURNAL OF GASTROINTESTINAL SURGERY | retrospective study | 2008 | 57 | 3.8 | 1 |
|  | Robot-assisted spleen-preserving distal pancreatectomy: a single surgeon's experiences and proposal of clinical application | Hwang, Ho Kyoung; Kang, Chang Moo; Chung, Young Eun; Kim, Kyung Ah; Choi, Sung Hoon; Lee, Woo Jung | JOURNAL OF SURGICAL ONCOLOGY | retrospective study | 2013 | 56 | 5.6 | 2a |
|  | Pancreatic Endocrine Tumors Less Than 4 cm in Diameter Resect or Enucleate? A Single-Center Experience | Casadei, Riccardo; Ricci, Claudio; Rega, Daniela; D'Ambra, Marielda; Pezzilli, Raffaele; Tomassetti, Paola; Campana, Davide; Nori, Francesca; Minni, Francesco | SURGICAL ENDOSCOPY AND OTHER INTERVENTIONAL TECHNIQUES | prospective study | 2010 | 56 | 4.31 | 4 |
|  | Metabolic consequences of a 50% partial pancreatectomy in humans | Menge, B. A.; Schrader, H.; Breuer, T. G. K.; Dabrowski, Y.; Uhl, W.; Schmidt, W. E.; Meier, J. J. | PANCREAS | prospective study | 2009 | 56 | 4 | 1 |
|  | Outcome after laparoscopic enucleation for non-functional neuroendocrine pancreatic tumours | Fernandez-Cruz, Laureano; Molina, Victor; Vallejos, Rodrigo; Jimenez Chavarria, Enrique; Lopez-Boado, Miguel-Angel; Ferrer, Joana | DIABETOLOGIA | prospective study | 2012 | 53 | 4.82 | 2a |
|  | Short- and long-term results of duodenum preservation versus resection for the management of chronic pancreatitis: A prospective, randomized study | Keck, Tobias; Adam, Ulrich; Makowiec, Frank; Riediger, Hartwig; Wellner, Ulrich; Tittelbach-Helmrich, Dietlind; Hopt, Ulrich T. | HPB | RCT | 2012 | 52 | 4.73 | 4 |
|  | One Hundred Thirty Resections for Pancreatic Neuroendocrine Tumor: Evaluating the Impact of Minimally Invasive and Parenchyma-Sparing Techniques | DiNorcia, Joseph; Lee, Minna K.; Reavey, Patrick L.; Genkinger, Jeanine M.; Lee, James A.; Schrope, Beth A.; Chabot, John A.; Allendorf, John D. | SURGERY | retrospective study | 2010 | 52 | 4 | 2a |
|  | New pancreas-preserving total duodenectomy technique | Imamura, M; Komoto, I; Doi, R; Onodera, H; Kobayashi, H; Kawai, Y | JOURNAL OF GASTROINTESTINAL SURGERY | case article | 2005 | 52 | 2.89 | 2a |
|  | Quality of life in chronic pancreatitis: A prospective trial comparing classical Whipple procedure and duodenum-preserving pancreatic head resection | Witzigmann, H; Max, D; Uhlmann, D; Geissler, F; Ludwig, S; Schwarz, R; Krauss, O; Lohmann, T; Keim, V; Hauss, J | WORLD JOURNAL OF SURGERY | prospective study | 2002 | 52 | 2.48 | 4 |
|  | Sporadic nonfunctioning pancreatic neuroendocrine tumors: Prognostic significance of incidental diagnosis | Birnbaum, David Jeremie; Gaujoux, Sebastien; Cherif, Rim; Dokmak, Safi; Fuks, David; Couvelard, Anne; Vullierme, Marie-Pierre; Ronot, Maxime; Ruszniewski, Philippe; Belghiti, Jacques; Sauvanet, Alain | JOURNAL OF GASTROINTESTINAL SURGERY | retrospective study | 2014 | 51 | 5.67 |  |
|  | Parenchyma-sparing resections for pancreatic neoplasms | Crippa, Stefano; Boninsegna, Letizia; Partelli, Stefano; Falconi, Massimo | SURGERY | review | 2010 | 51 | 3.92 |  |
|  | Pancreaticogastrostomy: A novel application after central pancreatectorny | Goldstein, MJ; Toman, J; Chabot, JA | JOURNAL OF HEPATO-BILIARY-PANCREATIC SCIENCES | retrospective study | 2004 | 50 | 2.63 | 2a |
|  | Postoperative glycemic pancreatectomy for control after central mid-gland lesions | Allendorf, John D.; Schrope, Beth A.; Lauerman, Margaret H.; Inabnet, William B.; Chabot, John A. | JOURNAL OF THE AMERICAN COLLEGE OF SURGEONS | retrospective study | 2007 | 49 | 3.06 | 1 |
|  | Nonstandard pancreatic resections for unusual lesions | Aranha, GV; Shoup, M | WORLD JOURNAL OF SURGERY | review | 2005 | 49 | 2.72 |  |
|  | Enucleation for benign or low-grade malignant lesions of the pancreas: Single-center experience with 65 consecutive patients | Song, Ki Byung; Kim, Song Cheol; Hwang, Dae Wook; Lee, Jae Hoon; Lee, Dong Joo; Lee, Jung Woo; Jun, Eun Sung; Sin, Sang Hyun; Kim, Heung En; Park, Kwang-Min; Lee, Young-Joo | AMERICAN JOURNAL OF SURGERY | retrospective study | 2015 | 48 | 6 | 1 |
|  | An antecolic Roux-en Y type reconstruction decreased delayed gastric emptying after pylorus-preserving pancreatoduodenectomy | Murakami, Yoshiaki; Uemura, Kenichiro; Sudo, Takeshi; Hayashidani, Yasuo; Hashimoto, Yasushi; Nakagawa, Naoya; Ohge, Hiroki; Sueda, Taijiro | SURGERY | retrospective study | 2008 | 48 | 3.2 | 2a |
|  | Increased rate of clinically relevant pancreatic fistula after deep enucleation of small pancreatic tumors | Heeger, Kristin; Falconi, Massimo; Partelli, Stefano; Waldmann, Jens; Crippa, Stefano; Fendrich, Volker; Bartsch, Detlef K. | JOURNAL OF GASTROINTESTINAL SURGERY | retrospective study | 2014 | 47 | 5.22 | 1 |
|  | Preservation of the Pyloric Ring Has Little Value in Surgery for Pancreatic Head Cancer: A Comparative Study Comparing Three Surgical Procedures | Fujii, Tsutomu; Kanda, Mitsuro; Kodera, Yasuhiro; Nagai, Shunji; Sahin, Tevfik T.; Hayashi, Masamichi; Kanzaki, Akiyuki; Yamada, Suguru; Sugimoto, Hiroyuki; Nomoto, Shuji; Takeda, Shin; Morita, Satoshi; Nakao, Akimasa | LANGENBECKS ARCHIVES OF SURGERY | retrospective study | 2012 | 47 | 4.27 | 3 |
|  | Comparison of central and extended left pancreatectomy for lesions of the pancreatic neck | Ocuin, Lee M.; Sarmiento, Juan M.; Staley, Charles A.; Galloway, John R.; Johnson, Colin D.; Wood, William C.; Kooby, David A. | ANNALS OF SURGICAL ONCOLOGY | retrospective study | 2008 | 47 | 3.13 | 4 |
|  | Pylorus-preserving pancreaticoduodenectomy in the treatment of chronic pancreatitis | Jimenez, RE; Castillo, CF; Rattner, DW; Warshaw, AL | ANNALS OF SURGICAL ONCOLOGY | review | 2003 | 47 | 2.35 |  |
|  | Pylorus-preserving pancreatoduodenectomy: Influence of a Billroth I versus a Billroth II type of reconstruction on gastric emptying | Goei, TH; Henegouwen, MIV; Slooff, MJH; van Gulik, TM; Gouma, DJ; Eddes, EH | WORLD JOURNAL OF SURGERY | retrospective study | 2001 | 47 | 2.14 | 2a |
|  | Indications and technique of central pancreatectomy - early and late results | Iacono, C; Bortolasi, L; Serio, G | DIGESTIVE SURGERY | review | 2005 | 46 | 2.56 |  |
|  | Parenchyma-Sparing Pancreatectomy for Presumed Noninvasive Intraductal Papillary Mucinous Neoplasms of the Pancreas | Sauvanet, Alain; Gaujoux, Sebastien; Blanc, Benjamin; Couvelard, Anne; Dokmak, Safi; Vullierme, Marie-Pierre; Ruszniewski, Philippe; Belghiti, Jacques; Levy, Philippe | LANGENBECKS ARCHIVES OF SURGERY | prospective study | 2014 | 45 | 5 | 4 |
|  | A prospective randomized comparison between pylorus- and subtotal stomach-preserving pancreatoduodenectomy on postoperative delayed gastric emptying occurrence and long-term nutritional status | Matsumoto, Ippei; Shinzeki, Makoto; Asari, Sadaki; Goto, Tadahiro; Shirakawa, Sachiyo; Ajiki, Tetsuo; Fukumoto, Takumi; Suzuki, Yasuyuki; Ku, Yonson | ANNALS OF SURGERY | RCT | 2014 | 45 | 5 | 4 |
|  | Delayed Gastric Emptying After Pancreatoduodenectomy | Kurahara, Hiroshi; Shinchi, Hiroyuki; Maemura, Kosei; Mataki, Yuko; Iino, Satoshi; Sakoda, Masahiko; Ueno, Shinichi; Takao, Sonshin; Natsugoe, Shoji | JOURNAL OF SURGICAL ONCOLOGY | RCT | 2011 | 45 | 3.75 | 2a |
|  | Early and enduring nutritional and functional results of pylorus preservation vs classic Whipple procedure for pancreatic cancer | Niedergethmann, Marco; Shang, Edward; Soliman, Michael Farag; Saar, Jochen; Berisha, Salih; Willeke, Frank; Post, Stefan | JOURNAL OF SURGICAL RESEARCH | Retrospective study | 2006 | 45 | 2.65 | 4 |
|  | Comparison of local resection of the head of the pancreas combined with longitudinal pancreaticojejunostomy (Frey procedure) and duodenum-preserving resection of the pancreatic head (Beger procedure) | Frey, CF; Mayer, KL | LANGENBECKS ARCHIVES OF SURGERY | review | 2018 | 45 | 2.25 |  |
|  | Pylorus Resection Does Not Reduce Delayed Gastric Emptying After Partial Pancreatoduodenectomy A Blinded Randomized Controlled Trial (PROPP Study, DRKS00004191) | Hackert, Thilo; Probst, Pascal; Knebel, Phillip; Doerr-Harim, Colette; Bruckner, Thomas; Klaiber, Ulla; Werner, Jens; Schneider, Lutz; Michalski, Christoph W.; Strobel, Oliver; Ulrich, Alexis; Diener, Markus K.; Buechler, Markus W. | ANNALS OF SURGERY | RCT | 2008 | 44 | 8.8 | 3 |
|  | Pancreatic Neuroendocrine Tumors (panNETs): Analysis of Overall Survival of Nonsurgical Management Versus Surgical Resection | Finkelstein, Paige; Sharma, Rishika; Picado, Omar; Gadde, Rahul; Stuart, Heather; Ripat, Caroline; Livingstone, Alan S.; Sleeman, Danny; Merchant, Nipun; Yakoub, Danny | JOURNAL OF GASTROINTESTINAL SURGERY | review | 2007 | 44 | 7.33 |  |
|  | Open and laparoscopic spleen-preserving, splenic vessel-preserving distal pancreatectomy: Indications and outcomes | Bruzoni, Matias; Sasson, Aaron R. | JOURNAL OF GASTROINTESTINAL SURGERY | retrospective study | 2007 | 44 | 2.93 | 1 |
|  | Laparoscopic spleen-preserving distal pancreatectomy as treatment for nesidioblastosis after gastric bypass surgery | Alvarez, Glauco C.; Faria, Everton N.; Beck, Maristela; Girardon, Dener T.; Machado, Ana Cristina | HEPATO-GASTROENTEROLOGY | case article | 2003 | 44 | 2.75 | 1 |
|  | Laparoscopic distal pancreatectomy: A comparative study | Tang, C. N.; Tsui, K. K.; Ha, J. P. Y.; Wong, D. C. T.; Li, M. K. W. | WORLD JOURNAL OF SURGERY | retrospective study | 2017 | 44 | 2.75 | 3 |
|  | Splenic Preserving Distal Pancreatectomy: Does Vessel Preservation Matter? | Beane, Joal D.; Pitt, Henry A.; Nakeeb, Attila; Schmidt, C. Max; House, Michael G.; Zyromski, Nicholas J.; Howard, Thomas J.; Lillemoe, Keith D. | JOURNAL OF GASTROINTESTINAL SURGERY | retrospective study | 2011 | 43 | 3.58 | 3 |
|  | Laparoscopic distal pancreatectomy with preservation of the spleen and splenic vessels for benign pancreas neoplasm | Han, HS; Min, S; Lee, H; Kim, SW; Park, YH | JOURNAL OF THE AMERICAN COLLEGE OF SURGEONS | retrospective study | 2005 | 43 | 2.39 | 1 |
|  | Reappraisal of pancreatic enucleations: A single-center experience of 126 procedures | Faitot, Francois; Gaujoux, Sebastien; Barbier, Louise; Novaes, Marleny; Dokmak, Safi; Aussilhou, Beatrice; Couvelard, Anne; Rebours, Vinciane; Ruszniewski, Philippe; Belghiti, Jacques; Sauvanet, Alain | SURGICAL ENDOSCOPY AND OTHER INTERVENTIONAL TECHNIQUES | retrospective study | 2015 | 42 | 5.25 | 4 |
|  | Parenchyma-sparing pancreatectomies for benign or border-line tumors of the pancreas | Sperti, Cosimo; Beltrame, Valentina; Milanetto, Anna Caterina; Moro, Margherita; Pedrazzoli, Sergio | SURGERY | review | 2010 | 42 | 3.23 |  |
|  | The Dagradi-Serio-Iacono operation central pancreatectomy | Iacono, Calogero; Bortolasi, Luca; Facci, Enrico; Nifosi, Filippo; Pachera, Silvia; Ruzzenente, Andrea; Guglielmi, Alfredo | WORLD JOURNAL OF GASTROINTESTINAL ONCOLOGY | others | 2007 | 42 | 2.63 | 2 |
|  | Risk of pancreatic fistula after enucleation of pancreatic tumours | Strobel, O.; Cherrez, A.; Hinz, U.; Mayer, P.; Kaiser, J.; Fritz, S.; Schneider, L.; Klauss, M.; Buechler, M. W.; Hackert, T. | PANCREAS | retrospective study | 2015 | 39 | 4.88 | 1 |
|  | Enucleation and Limited Pancreatic Resection Provide Long-Term Cure for lnsulinoma in Multiple Endocrine Neoplasia Type 1 | Bartsch, Detlef K.; Albers, Max; Knoop, Richard; Kann, Peter H.; Fendrich, Volker; Waldmann, Jens | BRITISH JOURNAL OF SURGERY | retrospective study | 2013 | 39 | 3.9 | 4 |
|  | Is it worthwhile to preserve adult spleen in laparoscopic distal pancreatectomy? Perioperative and patient-reported outcome analysis | Choi, Sung Hoon; Seo, Mi Ae; Hwang, Ho Kyoung; Kang, Chang Moo; Lee, Woo Jung | NEUROENDOCRINOLOGY | retrospective study | 2012 | 39 | 3.55 | 4 |
|  | Side-branch intraductal papillary mucinous neoplasms of the pancreatic head/uncinate: resection or enucleation? | Turrini, Olivier; Schmidt, C. Max; Pitt, Henry A.; Guiramand, Jerome; Aguilar-Saavedra, Juan R.; Aboudi, Shadi; Lillemoe, Keith D.; Delpero, Jean Robert | SURGICAL ENDOSCOPY AND OTHER INTERVENTIONAL TECHNIQUES | retrospective study | 2011 | 39 | 3.25 | 3 |
|  | The Inflammatory Pancreatic Head Mass Significant Differences in the Anatomic Pathology of German and American Patients With Chronic Pancreatitis Determine Very Different Surgical Strategies | Keck, Tobias; Marjanovic, Goran; Fernandez-del Castillo, Carlos; Makowiec, Frank; Schaefer, Arndt Oliver; Rodriguez, J. Ruben; Razo, Oswaldo; Hopt, Ulrich Theodor; Warshaw, Andrew L. | HPB | retrospective study | 2009 | 39 | 2.79 |  |
|  | Laparoscopic enucleation of insulinomas | Sweet, Matthew P.; Izumisato, Yumi; Way, Lawrence W.; Clark, Orlo H.; Masharani, Umesh; Duh, Quan-Yang | ANNALS OF SURGERY | retrospective study | 2007 | 39 | 2.44 | 1 |
|  | Pancreatic fibrosis correlates with delayed gastric emptying after pylorus-preserving pancreaticoduodenectomy with pancreaticogastrostomy | Murakami, H; Suzuki, H; Nakamura, T | ARCHIVES OF SURGERY | prospective study | 2002 | 39 | 1.86 |  |
|  | Limited Surgery for Benign Tumours of the Pancreas: A Systematic Review | Beger, H. G.; Siech, M.; Poch, B.; Mayer, B.; Schoenberg, M. H. | ANNALS OF SURGERY | review | 2015 | 38 | 4.75 |  |
|  | Laparoscopic Spleen-Preserving Distal Pancreatectomy: Comparative Study of Spleen Preservation with Splenic Vessel Resection and Splenic Vessel Preservation | Zhou, Zun Qiang; Kim, Song Cheol; Song, Ki Byung; Park, Kwang-Min; Lee, Jae Hoon; Lee, Young-Joo | WORLD JOURNAL OF SURGERY | retrospective study | 2014 | 38 | 4.22 | 3 |
|  | Delayed gastric emptying is associated with pylorus-preserving but not classical Whipple pancreaticoduodenectomy: A review of the literature and critical reappraisal of the implicated pathomechanism | Paraskevas, Kosmas I.; Avgerinos, Costas; Manes, Costas; Lytras, Dimitris; Dervenis, Christos | WORLD JOURNAL OF SURGERY | review | 2006 | 38 | 2.24 |  |
|  | Hybrid laparoscopic versus open pylorus-preserving pancreatoduodenectomy: retrospective matched case comparison in 80 patients | Wellner, Ulrich Friedrich; Kuesters, Simon; Sick, Olivia; Busch, Caroline; Bausch, Dirk; Bronsert, Peter; Hopt, Ulrich Theodor; Karcz, Konrad Wojciech; Keck, Tobias | WORLD JOURNAL OF GASTROENTEROLOGY | retrospective study | 2014 | 37 | 4.11 | 3 |
|  | Spleen-preserving distal pancreatectomy with and without splenic vessel ligation: a systematic review | Jain, Gaurav; Chakravartty, Saurav; Patel, Ameet G. | LANGENBECKS ARCHIVES OF SURGERY | review | 2013 | 37 | 3.7 |  |
|  | Lateral approach for laparoscopic splenic vessel-preserving distal pancreatectomy | Nakamura, Masafumi; Nagayoshi, Yosuke; Kono, Hiroshi; Mori, Yasuhisa; Ohtsuka, Takao; Takahata, Shunichi; Shimizu, Shuji; Tanaka, Masao | HPB | prospective study | 2011 | 37 | 3.08 | 2a |
|  | Risk of Varices Bleeding after Spleen-Preserving Distal Pancreatectomy with Excision of Splenic Artery and Vein | Tien, Yu-Wen; Liu, Kao-Lang; Hu, Rey-Heng; Wang, Hsiu-Po; Chang, King-Jen; Lee, Po-Huang | SURGERY | prospective study | 2010 | 37 | 2.85 | 1 |
|  | Enucleation of Pancreatic Lesions: Indications, Outcomes, and Risk Factors for Clinical Pancreatic Fistula | Zhang, Taiping; Xu, Jianwei; Wang, Tianxiao; Liao, Quan; Dai, Menghua; Zhao, Yupei | ANNALS OF SURGICAL ONCOLOGY | retrospective study | 2013 | 36 | 3.6 | 1 |
|  | Duodenum preservation in pancreatic head resection to maintain pancreatic exocrine function (determined by pancreatic function diagnostant test and cholecystokinin secretion) | Ito, K | JOURNAL OF GASTROINTESTINAL SURGERY | prospective study | 2005 | 36 | 2 | 1 |
|  | Evaluation of splenic circulation after spleen-preserving distal pancreatectomy by dividing the splenic artery and vein | Sato, Y; Shimoda, S; Takeda, N; Tanaka, N; Hatakeyama, K | DIGESTIVE SURGERY | prospective study | 2000 | 36 | 1.57 | 1 |
|  | Pancreatic head resection with segmental duodenectomy - Safety and long-term results | Nakao, Akimasa; Fernandez-Cruz, Laureano | DIGESTIVE SURGERY | prospective study | 2007 | 35 | 2.19 | 4 |
|  | Duodenal-preserving resection of the head of the pancreas and pancreatic head resection with second-portion duodenectomy for benign lesions, low-grade malignancies, and early carcinoma involving the periampullary region | Ahn, YJ; Kim, SW; Park, YC; Jang, JY; Yoon, YS; Park, YH | ANNALS OF SURGERY | retrospective study | 2003 | 35 | 1.75 | 3 |
|  | Which is a less invasive pancreatic head resection: PD, PPPD, or DPPHR? | Yamaguchi, K; Yokohata, K; Nakano, K; Ohtani, K; Ogawa, Y; Chijiwa, K; Tanaka, M | ARCHIVES OF SURGERY | retrospective study | 2001 | 35 | 1.59 | 3 |
|  | Surgical treatment in chronic pancreatitis timing and type of procedure | Bachmann, Kai; Kutup, Asad; Mann, Oliver; Yekebas, Emre; Izbicki, Jakob R. | DIGESTIVE DISEASES AND SCIENCES | review | 2010 | 34 | 2.62 |  |
|  | The feasibility of spleen-preserving pancreatectomy for end-stage chronic pancreatitis | White, SA; Sutton, CD; Weymss-Holden, S; Berry, DP; Pollard, C; Rees, Y; Dennison, AR | BEST PRACTICE & RESEARCH CLINICAL GASTROENTEROLOGY | prospective study | 2000 | 34 | 1.48 | 1 |
|  | Surgical Treatment Strategies in Chronic Pancreatitis A Meta-analysis | Yin, Zi; Sun, Jian; Yin, Dong; Wang, Jie | AMERICAN JOURNAL OF SURGERY | review | 2012 | 33 | 3 |  |
|  | Extended central pancreatic resection as an alternative for extended left or extended right resection for appropriate pancreatic neoplasms | Cataldegirmen, Guellue; Schneider, Claus G.; Bogoevski, Dean; Koenig, Alexandra; Kaifi, Jussuf T.; Bockhorn, Maximilian; Deutsch, Lena S.; Vashist, Yogesh; Izbicki, Jakob R.; Yekebas, Emre F. | ARCHIVES OF SURGERY | retrospective study | 2010 | 33 | 2.54 | 1 |
|  | Clinical and pathologic prognostic factors for curative resection for pancreatic cancer | Perini, M. V.; Montagnini, A. L.; Jukemura, J.; Penteado, S.; Abdo, E. E.; Patzina, R.; Cecconello, I.; Cunha, J. E. M. | SURGERY | retrospective study | 2008 | 33 | 2.2 | 3 |
|  | Perioperative and follow-up results after central pancreatic head resection (Berne technique) in a consecutive series of patients with chronic pancreatitis | Mueller, Michael W.; Friess, Helmut; Leitzbach, Sarah; Michalski, Christoph W.; Berberat, Pascal; Ceyhan, Gueralp O.; Hinz, Ulf; Ho, Choon-Kiat; Koeninger, Joerg; Kleeff, Joerg; Buechler, Markus W. | HPB | prospective study | 2008 | 33 | 2.2 | 1 |
|  | Five-year follow-up of a prospective non-randomised study comparing duodenum-preserving pancreatic head resection with classic Whipple procedure in the treatment of chronic pancreatitis | Moebius, C.; Max, D.; Uhlmann, D.; Gumpp, K.; Behrbohm, J.; Horvath, K.; Hauss, J.; Witzigmann, H. | AMERICAN JOURNAL OF SURGERY | prospective study | 2007 | 33 | 2.06 | 4 |
|  | Clinicopathologic features and outcomes of intraductal papillary-mucinous tumors of the pancreas | Sugiura, H; Kondo, S; Islam, HK; Ito, K; Ono, K; Morikawa, T; Okushiba, S; Katoh, H | LANGENBECKS ARCHIVES OF SURGERY | retrospective study | 2002 | 33 | 1.57 | 1 |
|  | Surgical treatment of intraductal papillary-mucinous tumors of the pancreas | Kanazumi, N; Nakao, A; Kaneko, T; Takeda, S; Harada, A; Inoue, S; Nagasaka, T; Nakashima, N | HEPATO-GASTROENTEROLOGY | retrospective study | 2001 | 33 | 1.5 | 1 |
|  | Splenic Preservation Versus Splenectomy During Distal Pancreatectomy: A Systematic Review and Meta-analysis | Shi, Ning; Liu, Shang-Long; Li, Ya-Tong; You, Lei; Dai, Meng-Hua; Zhao, Yu-Pei | HEPATO-GASTROENTEROLOGY | review | 2016 | 32 | 4.57 |  |
|  | Gastrointestinal function and quality of life after pylorus-preserving pancreatoduodenectomy | Ohtsuka, Takao; Tanaka, Masao; Miyazaki, Kohji | INTERNATIONAL JOURNAL OF SURGICAL PATHOLOGY | review | 2006 | 32 | 1.88 |  |
|  | Meta-analysis of delayed gastric emptying after pylorus-preserving versus pylorus-resecting pancreatoduodenectomy | Klaiber, U.; Probst, P.; Strobel, O.; Michalski, C. W.; Doerr-Harim, C.; Diener, M. K.; Buechler, M. W.; Hackert, T. |  | review | 2016 | 31 | 6.2 |  |
|  | Systematic Review and Meta-Analysis of Enucleation Versus Standardized Resection for Small Pancreatic Lesions | Chua, Terence C.; Yang, Timothy X.; Gill, Anthony J.; Samra, Jaswinder S. | ANNALS OF SURGICAL ONCOLOGY | retrospective study | 2011 | 31 | 4.43 |  |
|  | Clinical Validation of the ISGPF Classification and the Risk Factors of Pancreatic Fistula Formation Following Duct-to-Mucosa Pancreaticojejunostomy by One Surgeon at a Single Center | Kim, Woo Seok; Choi, Dong Wook; Choi, Seong Ho; Heo, Jin Seok; Kim, Min Jung; Song, Sun Choon; Lee, Hyung Geun; Do You, Dong | JOURNAL OF GASTROINTESTINAL SURGERY | retrospective study | 2005 | 31 | 2.58 | 3 |
|  | Improved outcomes for benign disease with limited pancreatic head resection | Aspelund, G; Topazian, MD; Lee, JH; Andersen, DK | PANCREAS | prospective study | 2005 | 31 | 1.72 | 3 |
|  | Duodenopancreatectomy versus duodenum-preserving pancreatic head excision for chronic pancreatitis | Belina, F; Fronek, J; Ryska, M | JOURNAL OF GASTROINTESTINAL SURGERY | prospective study | 2005 | 31 | 1.72 | 4 |
|  | Pylorus-preserving total pancreatectomy - Early and late results | Wagner, M; Z'graggen, K; Vagianos, CE; Redaelli, CA; Holzinger, F; Sadowski, C; Kulli, C; Zimmerman, H; Baer, HU; Buchler, MW | PANCREATOLOGY | prospective study | 2001 | 31 | 1.41 | 4 |
|  | Minimally Invasive Pancreatic Surgery | Stauffer, John A.; Asbun, Horacio J. | Semin Oncol | review | 2015 | 30 | 3.75 |  |
|  | Duodenum-preserving versus pylorus-preserving pancreatic head resection for benign and premalignant lesions | Pedrazzoli, Sergio; Canton, Silvio Alen; Sperti, Cosimo | JOURNAL OF HEPATO-BILIARY-PANCREATIC SCIENCES | prospective study | 2001 | 30 | 2.5 | 3 |
|  | A vertical stomach reconstruction after pylorus-preserving pancreaticoduodenectomy | Murakami, H; Yasue, M | AMERICAN JOURNAL OF SURGERY | retrospective study | 2017 | 30 | 1.36 | 2a |
|  | Enucleation: A treatment alternative for branch duct intraductal papillary mucinous neoplasms | Kaiser, Joerg; Fritz, Stefan; Klauss, Miriam; Bergmann, Frank; Hinz, Ulf; Strobel, Oliver; Schneider, Lutz; Buehler, Markus W.; Hackert, Thilo | SURGERY | retrospective study | 2015 | 29 | 4.83 | 3 |
|  | Laparoscopic central pancreatectomy for benign or low-grade malignant lesions in the pancreatic neck and proximal body | Song, Ki Byung; Kim, Song Cheol; Park, Kwang-Min; Hwang, Dae Wook; Lee, Jae Hoon; Lee, Dong Joo; Lee, Jung Woo; Jun, Eun Sung; Shin, Sang Hyun; Kim, Hyoung Eun; Lee, Young-Joo | SURGICAL ENDOSCOPY AND OTHER INTERVENTIONAL TECHNIQUES | retrospective study | 2015 | 29 | 3.63 | 2a |
|  | Robotic-Assisted Minimally Invasive Central Pancreatectomy: Technique and Outcomes | Abood, Gerard J.; Can, M. Fatih; Daouadi, Mustapha; Huss, Harold T.; Steve, Jennifer Y.; Ramalingam, Lekshmi; Stang, Michael; Bartlett, David L.; Zeh, Herbert J., III; Moser, A. James | SEMINARS IN ONCOLOGY | retrospective study | 2013 | 29 | 2.9 | 2a |
|  | Revisiting vascular patency after spleen-preserving laparoscopic distal pancreatectomy with conservation of splenic vessels | Hwang, Ho Kyoung; Chung, Young Eun; Kim, Kyoung Ah; Kang, Chang Moo; Lee, Woo Jung | JOURNAL OF GASTROINTESTINAL SURGERY | retrospective study | 2012 | 29 | 2.64 | 1 |
|  | Laparoscopic Versus Open Enucleation for Solitary Insulinoma in the Body and Tail of the Pancreas | Karaliotas, Constantine; Sgourakis, George | SURGICAL ENDOSCOPY AND OTHER INTERVENTIONAL TECHNIQUES | retrospective study | 2009 | 29 | 2.07 | 2a |
|  | Middle segment pancreatectomy can be safely incorporated into a pancreatic surgeon's clinical practice | Lavu, Harish; Knuth, Jamie L.; Baker, Marshall S.; Shen, Changyu; Zyromski, Nicholas J.; Schmidt, Max; Nakeeb, Atilla; Howard, Thomas J. | JOURNAL OF GASTROINTESTINAL SURGERY | retrospective study | 2008 | 29 | 1.93 | 1 |
|  | Clinical Comparison of Distal Pancreatectomy with or without Splenectomy | Lee, Seung Eun; Jang, Jin-Young; Lee, Kuhn Uk; Kim, Sun-Whe | HPB | retrospective study | 2008 | 29 | 1.93 | 3 |
|  | Gastroparesis after a pylorus-preserving pancreatoduodenectomy | Tanaka, M | JOURNAL OF KOREAN MEDICAL SCIENCE | review | 2005 | 29 | 1.61 |  |
|  | Effect of surgery for chronic pancreatitis on pancreatic function: Pancreatico-jejunostomy and duodenum-preserving resection of the head of the pancreas | Maartense, S; Ledeboer, M; Bemelman, WA; Ringers, J; Frolich, M; Masclee, AM | SURGERY TODAY | prospective study | 2004 | 29 | 1.53 | 1 |
|  | Mucin secreting cystic lesions of the pancreas: Treatment by enucleation | Madura, JA; Yum, MN; Lehman, GA; Sherman, S; Schmidt, CM | SURGERY | review | 2004 | 29 | 1.53 |  |
|  | Pancreatoduodenectomy in the treatment of chronic pancreatitis | Russell, RCG; Theis, BA | AMERICAN SURGEON | retrospective study | 2003 | 29 | 1.45 | 3 |
|  | The role of central pancreatectomy in pancreatic surgery: a systematic review and meta-analysis | Xiao, Weidong; Zhu, Jisheng; Peng, Long; Hong, Le; Sun, Gen; Li, Yong | SURGICAL LAPAROSCOPY ENDOSCOPY & PERCUTANEOUS TECHNIQUES | review | 2018 | 28 | 5.6 |  |
|  | Robotic Enucleation for Benign or Borderline Tumours of the Pancreas: A Retrospective Analysis and Comparison from a High-Volume Centre in Asia | Jin, Jia-Bin; Qin, Kai; Li, Hua; Wu, Zhi-Chong; Zhan, Qian; Deng, Xia-Xing; Chen, Hao; Shen, Bai-Yong; Peng, Cheng-hong; Li, Hong-Wei | HPB | retrospective study | 2016 | 28 | 4 | 2a |
|  | Short- and long-term outcomes after enucleation of pancreatic tumors: An evidence-based assessment | Zhou, Yanming; Zhao, Min; Wu, Lupeng; Ye, Feng; Si, Xiaoying | WORLD JOURNAL OF SURGERY | review | 2016 | 28 | 4 |  |
|  | Splenic vessel preservation versus Warshaw's technique during spleen-preserving distal pancreatectomy: a meta-analysis and systematic review | Yu, Xinzhe; Li, Hengchao; Jin, Chen; Fu, Deliang; Di, Yang; Hao, Sijie; Li, Ji | PANCREATOLOGY | review | 2015 | 28 | 3.5 |  |
|  | Laparoscopic Spleen-Preserving Distal Pancreatectomy: The Technique Must Suit the Lesion | Worhunsky, David J.; Zak, Yulia; Dua, Monica M.; Poultsides, George A.; Norton, Jeffrey A.; Visser, Brendan C. | LANGENBECKS ARCHIVES OF SURGERY | retrospective study | 2014 | 28 | 3.11 | 2a |
|  | Is there an advantage in performing a pancreas-preserving total duodenectomy in duodenal adenomatosis? | Mueller, Michael W.; Dahmen, Rolf; Koeninger, Joerg; Michalski, Christoph W.; Hinz, Ulf; Hartel, Mark; Kadmon, Martina; Kleeff, Joerg; Buechler, Markus W.; Friess, Helmut | JOURNAL OF GASTROINTESTINAL SURGERY | prospective study | 2008 | 28 | 1.87 | 3 |
|  | Duodenum-preserving total pancreatic head resection for cystic neoplastic lesions in the head of the pancreas | Beger, Hans G.; Gansauge, Frank; Siech, Marko; Schwarz, Michael; Poch, Bertram | AMERICAN JOURNAL OF SURGERY | retrospective study | 2008 | 28 | 1.87 | 1 |
|  | Laparoscopic spleen-preserving distal pancreatectomy | Khanna, A; Koniaris, LG; Nakeeb, A; Schoeniger, LO | JOURNAL OF HEPATO-BILIARY-PANCREATIC SURGERY | case article | 2005 | 28 | 1.56 | 1 |
|  | Organ-preserving pancreatic head resection in chronic pancreatitis | Farkas, G; Leindler, L; Daroczi, M; Farkas, G | JOURNAL OF GASTROINTESTINAL SURGERY | retrospective study | 2003 | 28 | 1.4 | 1 |
|  | Laparoscopic enucleation of insulinoma in the pancreas - Case report and review of the literature | Furihata, M; Tagaya, N; Kubota, K | BRITISH JOURNAL OF SURGERY | case article | 2001 | 28 | 1.27 | 1 |
|  | Reduced Pancreatic Parenchymal Thickness Indicates Exocrine Pancreatic Insufficiency After Pancreatoduodenectomy | Nakamura, Hiroyuki; Murakami, Yoshiaki; Uemura, Kenichiro; Hayashidani, Yasuo; Sudo, Takeshi; Ohge, Hiroki; Sueda, Taijiro | SURGICAL LAPAROSCOPY ENDOSCOPY & PERCUTANEOUS TECHNIQUES | prospective study | 2008 | 27 | 2.25 | 1 |
|  | Surgical Approach and Perioperative Complications Determine Short-Term Outcomes in Patients with Insulinoma: Results of a Bi-Institutional Study | Roland, Christina L.; Lo, Chung-Yau; Miller, Barbra S.; Holt, Shelby; Nwariaku, Fiemu E. | ANNALS OF SURGICAL ONCOLOGY | retrospective study | 2007 | 27 | 1.8 | 2b |
|  | Spleen-preserving distal pancreatectomy with conservation of the splenic artery and vein | Kimura, Wataru; Moriya, Toshiyuki; Ma, Jinfeng; Kamio, Yukinori; Watanabe, Toshihiro; Yano, Mitsukiro; Fujimoto, Hiroto; Tezuka, Koji; Hirai, Ichiro; Fuse, Akira | WORLD JOURNAL OF GASTROENTEROLOGY | review | 2003 | 27 | 1.69 |  |
|  | Randomized prospective trial of the effect of induced hypergastrinemia on the prevention of pancreatic atrophy after pancreatoduodenectomy in humans | Jang, JY; Kim, SW; Han, JK; Park, SJ; Park, YC; Ahn, YJ; Park, YH | ANNALS OF SURGERY | prospective study | 2017 | 27 | 1.35 |  |
|  | Splenic preservation in laparoscopic distal pancreatectomy | Dai, M. -H.; Shi, N.; Xing, C.; Liao, Q.; Zhang, T. -P.; Chen, G.; Wu, W. -M.; Guo, J. -C.; Liu, Z. -W.; Zhao, Y. -P. | BRITISH JOURNAL OF SURGERY | retrospective study | 2011 | 26 | 4.33 | 2a |
|  | Minimally invasive preservation versus splenectomy during distal pancreatectomy: a systematic review and meta-analysis | Nakata, Kohei; Shikata, Satoru; Ohtsuka, Takao; Ukai, Tomohiko; Miyasaka, Yoshihiro; Mori, Yasuhisa; Velasquez, Vittoria Vanessa D. M.; Gotoh, Yoshitaka; Ban, Daisuke; Nakamura, Yoshiharu; Nagakawa, Yuichi; Tanabe, Minoru; Sahara, Yatsuka; Takaori, Kyoichi; Honda, Goro; Misawa, Takeyuki; Kawai, Manabu; Yamaue, Hiroki; Morikawa, Takanori; Kuroki, Tamotsu; Mou, Yiping; Lee, Woo-Jung; Shrikhande, Shailesh V.; Tang, Chung Ngai; Conrad, Claudius; Han, Ho-Seong; Chinnusamy, Palanivelu; Asbun, Horacio J.; Kooby, David A.; Wakabayashi, Go; Takada, Tadahiro; Yamamoto, Masakazu; Nakamura, Masafumi | VIRCHOWS ARCHIV | review | 2016 | 25 | 5 |  |
|  | Laparoscopic versus open enucleation for pancreatic neoplasms: clinical outcomes and pancreatic function analysis | Zhang, Ren-Chao; Zhou, Yu-Cheng; Mou, Yi-Ping; Huang, Chao-Jie; Jin, Wei-Wei; Yan, Jia-Fei; Wang, Yong-Xiang; Liao, Yi | SURGICAL ENDOSCOPY AND OTHER INTERVENTIONAL TECHNIQUES | retrospective study | 2013 | 25 | 3.57 | 3 |
|  | Laparoscopic Central Pancreatectomy: A Review of 51 Cases | Machado, Marcel Autran C.; Surjan, Rodrigo Canada; Epstein, Marina G.; Makdissi, Fabio Ferrari | SURGICAL LAPAROSCOPY ENDOSCOPY & PERCUTANEOUS TECHNIQUES | review | 2003 | 25 | 2.5 |  |
|  | Laparoscopic segmental pancreatic resection for benign cystadenoma | Baca, I; Bokan, I | CHIRURG | review | 2002 | 25 | 1.25 |  |
|  | Surgical treatment and long-term follow-up in chronic pancreatitis | Friess, H; Berberat, PO; Wirtz, M; Buchler, MW | EUROPEAN JOURNAL OF GASTROENTEROLOGY & HEPATOLOGY | review | 2001 | 25 | 1.19 |  |
|  | Quality of life after pylorus-preserving pancreatoduodenectomy | Ohtsuka, T; Yamaguchi, K; Chijiiwa, K; Kinukawa, N; Tanaka, M | AMERICAN JOURNAL OF SURGERY | retrospective study | 2001 | 25 | 1.14 | 4 |
|  | Pancreatic head resection with second-portion duodenectomy for benign lesions, low-grade malignancies, and early stage carcinomas involving the pancreatic head region | Isaji, S; Kawarada, Y | AMERICAN JOURNAL OF SURGERY | retrospective study | 2000 | 25 | 1.14 | 1 |
|  | Manometric evidence of improved early gastric stasis by erythromycin after pylorus-preserving pancreatoduodenectomy红霉素改良 | Matsunaga, H; Tanaka, M; Takahata, S; Ogawa, Y; Naritomi, G; Yokohata, K; Yamaguchi, K; Chijiiwa, K | WORLD JOURNAL OF SURGERY | prospective study | 2018 | 25 | 1.09 |  |
|  | Technical Aspects of Laparoscopic Distal Pancreatectomy for Benign and Malignant Disease: Review of the Literature | de Rooij, T.; Sitarz, R.; Busch, O. R.; Besselink, M. G.; Abu Hilal, M. | JOURNAL OF HEPATO-BILIARY-PANCREATIC SCIENCES | review | 2015 | 24 | 3 |  |
|  | Robotic Distal Pancreatectomy | Suman, Paritosh; Rutledge, John; Yiengpruksawan, Anusak | GASTROENTEROLOGY RESEARCH AND PRACTICE | retrospective study | 2013 | 24 | 2.4 | 2a |
|  | Pylorus- and spleen-preserving total pancreatoduodenectomy with resection of both whole splenic vessels: feasibility and laparoscopic application to intraductal papillary mucin-producing tumors of the pancreas | Choi, Sung Hoon; Hwang, Ho Kyoung; Kang, Chang Moo; Yoon, Chang Ik; Lee, Woo Jung | JSLS-JOURNAL OF THE SOCIETY OF LAPAROENDOSCOPIC SURGEONS | retrospective study | 2012 | 24 | 2.18 | 2a |
|  | Laparoscopic spleen-preserving distal pancreatectomy in elderly subjects: splenic vessel sacrifice may be associated with a higher rate of splenic infarction | Baldwin, Keith M.; Katz, Steven C.; Espat, N. Joseph; Somasundar, Ponnandai | SURGICAL ENDOSCOPY AND OTHER INTERVENTIONAL TECHNIQUES | retrospective study | 2011 | 24 | 2 | 2a |
|  | The First Experience of Robot Assisted Spleen-Preserving Laparoscopic Distal Pancreatectomy in Korea | Kim, Dong Hyun; Kang, Chang Moo; Lee, Woo Jung; Chi, Hoon Sang | HPB | case article | 2011 | 24 | 2 | 2a |
|  | A comparison of pancreaticoduodenectomy and duodenum-preserving head resection for the treatment of chronic pancreatitis | McClaine, Rebecca J.; Lowy, Andrew M.; Matthews, Jeffrey B.; Schmulewitz, Nathan; Sussman, Jeffrey J.; Ingraham, Angela M.; Ahmad, Syed A. | YONSEI MEDICAL JOURNAL | retrospective study | 2009 | 24 | 1.71 | 4 |
|  | Pancreatic head resection: the risk for local and systemic complications in 1315 patients - a monoinstitutional experience | Beger, Hans G.; Gansauge, Frank; Schwarz, Michael; Poch, Bertram | HPB | retrospective study | 2007 | 24 | 1.5 |  |
|  | Pancreatic head resection with segmental duodenectomy for intraductal papillary mucinous tumors of the pancreas | Murakami, Y; Uemura, K; Yokoyama, Y; Sasaki, M; Morifuji, M; Hayashidani, Y; Sudo, T; Sueda, T | AMERICAN JOURNAL OF SURGERY | retrospective study | 2004 | 24 | 1.26 | 1 |
|  | Is there any benefit of preservation of the spleen in distal pancreatectomy? | Yamaguchi, K; Noshiro, H; Yokohata, K; Nakano, K; Watanabe, M; Ohtani, K; Chijiiwa, K; Tanaka, M | JOURNAL OF GASTROINTESTINAL SURGERY | retrospective study | 2001 | 24 | 1.09 | 4 |
|  | Enucleation of pancreatic solid pseudopapillary neoplasm: Short-term and long-term outcomes from a 7-year large single-center experience | Wang, Xing; Chen, Yong-Hua; Tan, Chun-lu; Zhang, Hao; Xiong, Jun-jie; Chen, Hong-yu; Ke, Neng-wen; Liu, Xu-Bao | INTERNATIONAL SURGERY | retrospective study | 2018 | 23 | 4.6 | 4 |
|  | Distal Pancreatectomy for Benign and Low Grade Malignant Tumors: Short-Term Postoperative Outcomes of Spleen Preservation-A Systematic Review and Update Meta-Analysis | Pendola, Fiorella; Gadde, Rahul; Ripat, Caroline; Sharma, Rishika; Picado, Omar; Lobo, Laila; Sleeman, Danny; Livingstone, Alan S.; Merchant, Nipun; Yakoub, Danny | EJSO | review | 2005 | 23 | 3.83 |  |
