# Supplementary material for: Research Trend of Organ-Preserving Pancreatic Resection from 2000 to 2022: A Bibliometric and Visualized Analysis
Source: Research Square preprint supplement (doi:10.21203/rs.3.rs-2179955/v1), 2022-10-18
Supplement: Supplementary file 2 [file a74f5d7754f22e2d17209025.docx]

Table S2 Types of the T200 articles

| Clinical study | | | | Review | Othersa |
| --- | --- | --- | --- | --- | --- |
| RCT | Retrospective study | Prospective study | Case  article |
| 16 | 101 | 43 | 5 | 31 | 3 |

a Descriptive studies, meetings, editorial materials, and mixed studies of prospective and retrospective studies.
